# Supplementary material for: Preventing ATP Degradation by ASO-Mediated Knockdown of CD39 and CD73 Results in A2aR-Independent Rescue of T Cell Proliferation
Source: PubMed Central journal article supplement (PMC7393471; doi:10.1016/j.omtn.2020.06.020), 2020-06-27
Supplement: mmc1.pdf [file mmc1.pdf]

**OMTN, Volume 21**

**Supplemental Information**

**Preventing ATP Degradation by ASO-Mediated  
Knockdown of CD39 and CD73 Results in  
A2aR-Independent Rescue of T Cell Proliferation**

**Julia Festag, Tamara Thelemann, Monika Schell, Stefanie Raith, Sven Michel, Frank Jaschinski, and Richard Klar**

## Supplemental Figures

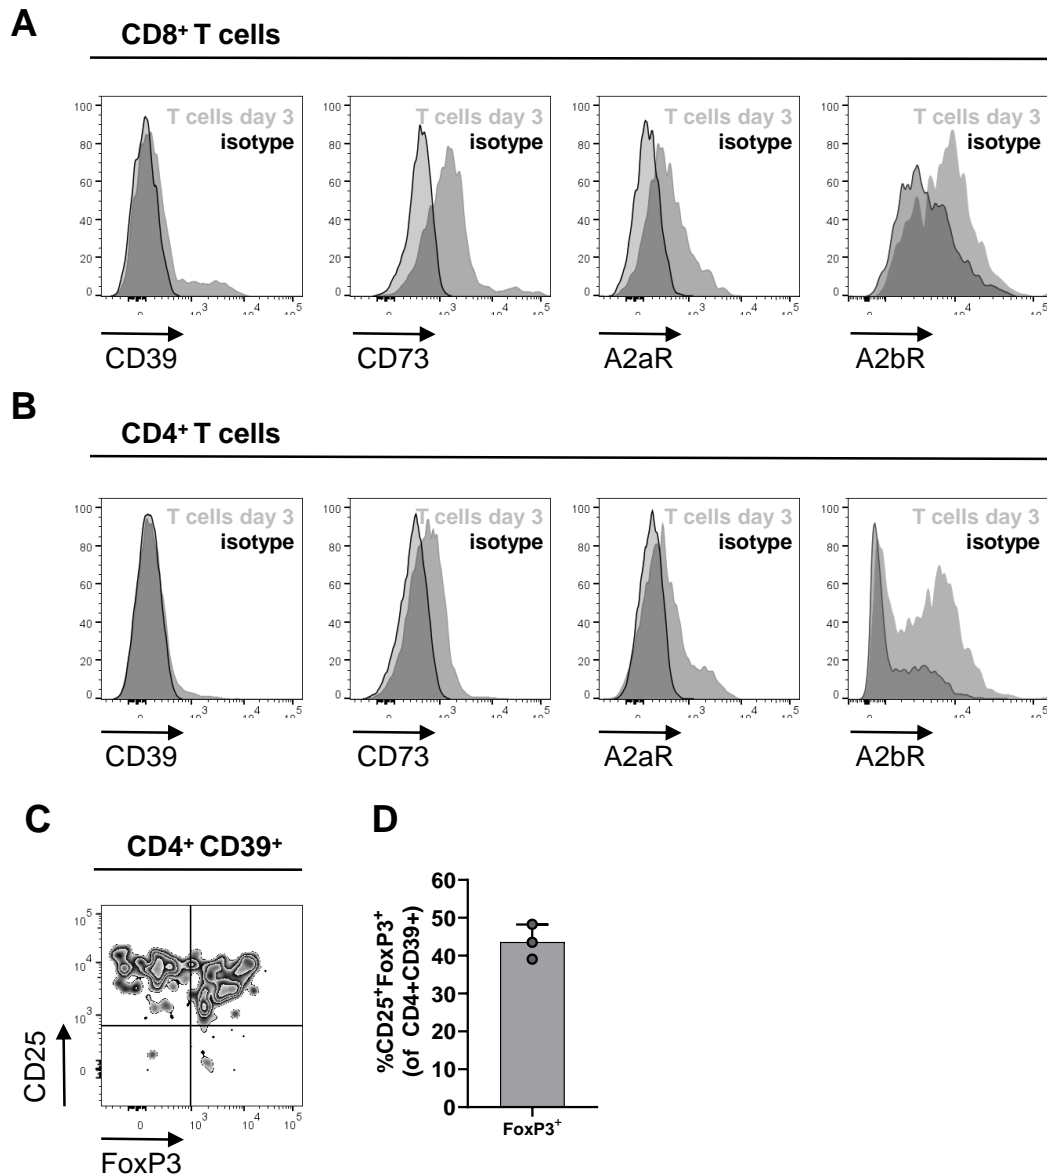

**Figure S1: CD39, CD73, A2aR and A2bR expression in human T cells.** CD39, CD73, A2aR and A2bR expression on day 3 after activation compared to isotype controls in CD8<sup>+</sup> (A) and CD4<sup>+</sup> (B) T cells. (C) CD25 and FoxP3 expression on CD4<sup>+</sup> CD39<sup>+</sup> T cells. Representative result from three technical replicates and three independent experiments are shown. (D) Frequency of T<sub>regs</sub> (CD25<sup>+</sup>FoxP3<sup>+</sup>) of CD4<sup>+</sup> CD39<sup>+</sup> T cells. Bar graph depicts the mean of three donors run in triplicates + SD.

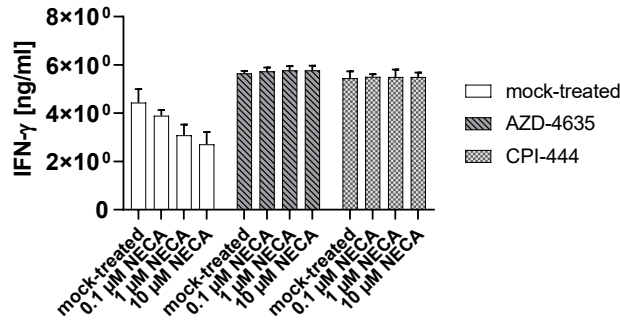

**Figure S2: Effect of adenosine analogue NECA and A2aR blockade on IFN- $\gamma$  secretion of activated PBMC.** Human PBMC were treated with 10  $\mu$ M of A2aR inhibitors AZD-4635 or CPI-444 or left untreated (mock-treated). Additionally, medium was supplemented with different concentrations of NECA. Subsequently, PBMC were activated using anti-CD2/CD3/CD28 tetrameric antibody complexes and IFN- $\gamma$  concentration in the supernatant was analyzed 48 h later. The mean + SD from three technical replicates is depicted. Representative results from two independent experiments are shown.

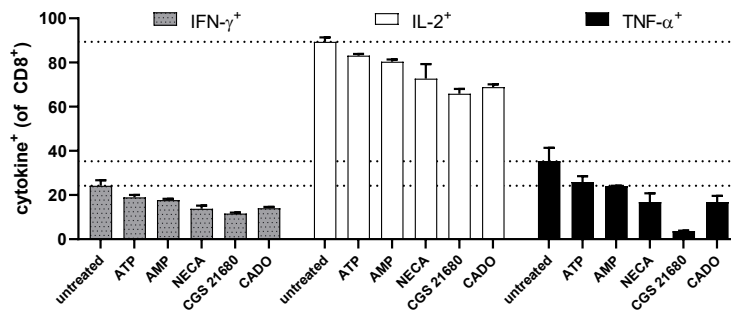

**Figure S3: Pro-inflammatory cytokine secretion of T-cell cultures supplemented with extracellular ATP, AMP or the adenosine analogues NECA, CGS 21680 or CADO.** Frequency of IFN- $\gamma^+$ , IL-2 $^+$  or TNF- $\alpha^+$  CD8 $^+$  T cells after addition of ATP (400  $\mu$ M), AMP (600  $\mu$ M) or the adenosine analogues NECA (1000  $\mu$ M), CGS 21680 (1000  $\mu$ M) or CADO (30  $\mu$ M) on day 3 after activation. Intracellular cytokine staining was performed on day 5 after activation. The mean + SD of three technical replicates is depicted. Representative results from three independent experiments are shown.

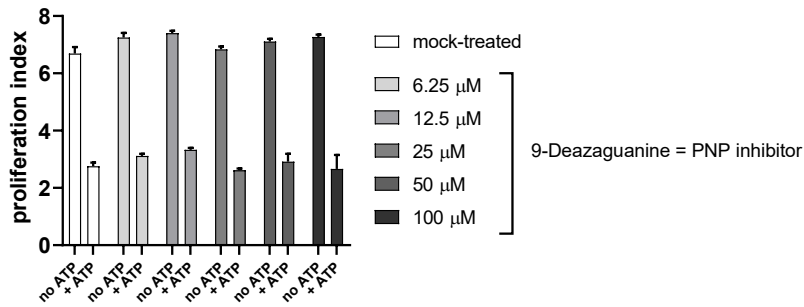

**Figure S4: Influence of inhibition of PNP by 9-Deazaguanine.** Human T cells were labelled with a proliferation dye and activated with anti-CD2/CD3/CD28 tetrameric antibody complexes. On day 3 PNP inhibitor 9-Deazaguanin was added at indicated concentrations and 400  $\mu$ M ATP was added to the cells. Proliferation of T cells was analyzed by flow cytometry on day 5 and proliferation indices were calculated. The mean + SD of three technical replicates is depicted. Representative results from two independent experiments are shown.
